# Supplementary figures and images for: A meta-analysis of changes in bacterial and archaeal communities with time
Source: PubMed Central journal article supplement — ISME J. 2013 Apr 11;7(8):1493–506. doi: 10.1038/ismej.2013.54 (PMC3721121; doi:10.1038/ismej.2013.54), 2013-04-11

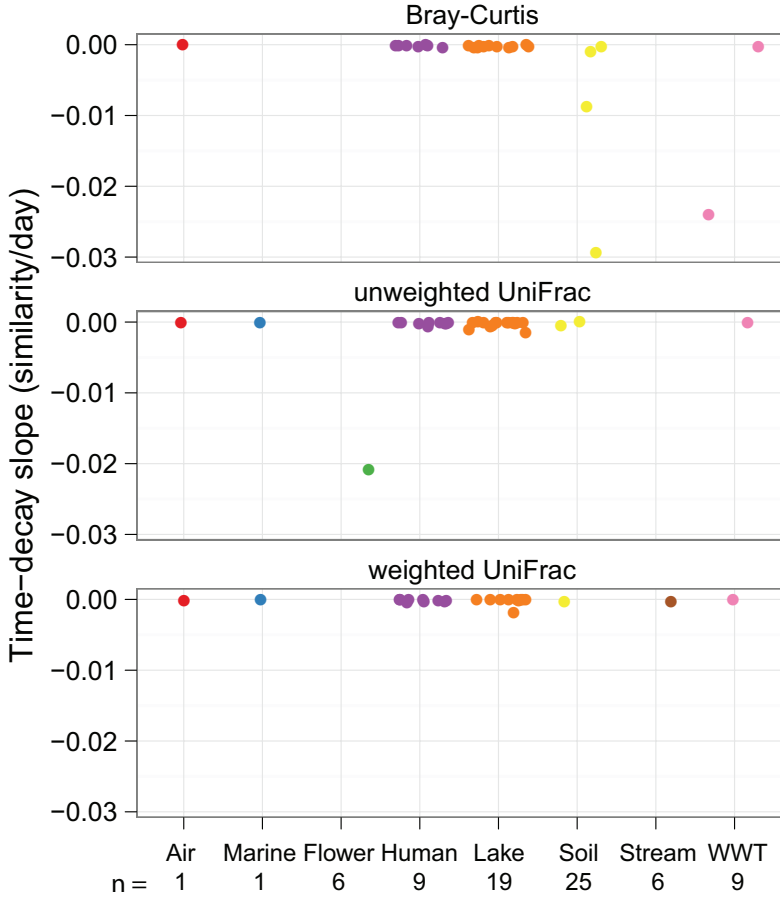

Supplement: ismej201354x4.pdf [file ismej201354x4.pdf]
